# Supplementary material for: Time trends in the incidence of clinically diagnosed type 2 diabetes and pre-diabetes in the UK 2009–2018: a retrospective cohort study
Source: PubMed Central journal article supplement (PMC7986873; doi:10.1136/bmjdrc-2020-001989), 2021-03-19
Supplement: bmjdrc-2020-001989supp001.pdf [file bmjdrc-2020-001989supp001.pdf]

**Appendix 1: Read code lists****Diabetes**

| medcode | description                                           |
|---------|-------------------------------------------------------|
| 13AB.00 | Diabetic lipid lowering diet                          |
| 13AC.00 | Diabetic weight reducing diet                         |
| 13B1.00 | Diabetic diet                                         |
| 1434.00 | H/O: diabetes mellitus                                |
| 14F4.00 | H/O: Admission in last year for diabetes foot problem |
| 1M8..00 | Diabetic peripheral neuropathic pain                  |
| 2BBF.00 | Retinal abnormality - diabetes related                |
| 2BBJ.00 | O/E - no right diabetic retinopathy                   |
| 2BBK.00 | O/E - no left diabetic retinopathy                    |
| 2BBL.00 | O/E - diabetic maculopathy present both eyes          |
| 2BBM.00 | O/E - diabetic maculopathy absent both eyes           |
| 2BBP.00 | O/E - right eye background diabetic retinopathy       |
| 2BBQ.00 | O/E - left eye background diabetic retinopathy        |
| 2BBR.00 | O/E - right eye preproliferative diabetic retinopathy |
| 2BBS.00 | O/E - left eye preproliferative diabetic retinopathy  |
| 2BBT.00 | O/E - right eye proliferative diabetic retinopathy    |
| 2BBV.00 | O/E - left eye proliferative diabetic retinopathy     |
| 2BBW.00 | O/E - right eye diabetic maculopathy                  |
| 2BBX.00 | O/E - left eye diabetic maculopathy                   |
| 2BBk.00 | O/E - right eye stable treated prolif diabetic retino |
| 2BBI.00 | O/E - left eye stable treated prolif diabetic retinop |
| 2BBo.00 | O/E - sight threatening diabetic retinopathy          |
| 2BBr.00 | Impair vision due diab retinop                        |
| 2G51000 | Foot abnormality - diabetes related                   |
| 2G5A.00 | O/E - Right diabetic foot at risk                     |
| 2G5B.00 | O/E - Left diabetic foot at risk                      |
| 2G5C.00 | Foot abnormality - diabetes related                   |
| 2G5E.00 | O/E - Right diabetic foot at low risk                 |
| 2G5F.00 | O/E - Right diabetic foot at moderate risk            |
| 2G5G.00 | O/E - Right diabetic foot at high risk                |
| 2G5H.00 | O/E - Right diabetic foot - ulcerated                 |
| 2G5I.00 | O/E - Left diabetic foot at low risk                  |
| 2G5J.00 | O/E - Left diabetic foot at moderate risk             |
| 2G5K.00 | O/E - Left diabetic foot at high risk                 |
| 2G5L.00 | O/E - Left diabetic foot - ulcerated                  |
| 2G5V.00 | O/E - right chronic diabetic foot ulcer               |
| 2G5W.00 | O/E - left chronic diabetic foot ulcer                |
| 2G5d.00 | O/E - Left diabetic foot at increased risk            |
| 2G5e.00 | O/E - Right diabetic foot at increased risk           |
| 3882.00 | Diabetes well being questionnaire                     |
| 3883.00 | Diabetes treatment satisfaction questionnaire         |
| 42c1.00 | HbA1 7 - 10% - borderline control                     |
| 42c2.00 | HbA1 > 10% - bad control                              |
| 661M400 | Diabetes self-management plan agreed                  |
| 661N400 | Diabetes self-management plan review                  |
| 66A..00 | Diabetic monitoring                                   |
| 66A1.00 | Initial diabetic assessment                           |

66A2.00 Follow-up diabetic assessment  
66A3.00 Diabetic on diet only  
66A4.00 Diabetic on oral treatment  
66A5.00 Diabetic on insulin  
66A8.00 Has seen dietician - diabetes  
66A9.00 Understands diet - diabetes  
66AA.11 Injection sites - diabetic  
66AD.00 Fundoscopy - diabetic check  
66AG.00 Diabetic drug side effects  
66AH.00 Diabetic treatment changed  
66AH000 Conversion to insulin  
66AH100 Conversion to insulin in secondary care  
66AH300 Conversion to non-insulin injectable medication  
66AI.00 Diabetic - good control  
66AJ.00 Diabetic - poor control  
66AJ.11 Unstable diabetes  
66AJ100 Brittle diabetes  
66AJz00 Diabetic - poor control NOS  
66AK.00 Diabetic - cooperative patient  
66AL.00 Diabetic-uncooperative patient  
66AM.00 Diabetic - follow-up default  
66AN.00 Date diabetic treatment start  
66AO.00 Date diabetic treatment stopp.  
66AP.00 Diabetes: practice programme  
66AQ.00 Diabetes: shared care programme  
66AQ000 Unsuitable for diabetes year of care programme  
66AQ100 Declined consent for diabetes year of care programme  
66AR.00 Diabetes management plan given  
66AS.00 Diabetic annual review  
66AT.00 Annual diabetic blood test  
66AU.00 Diabetes care by hospital only  
66AV.00 Diabetic on insulin and oral treatment  
66AW.00 Diabetic foot risk assessment  
66AX.00 Diabetes: shared care in pregnancy - diabetol and obs  
66AY.00 Diabetic diet - good compliance  
66AZ.00 Diabetic monitoring NOS  
66Aa.00 Diabetic diet - poor compliance  
66Ab.00 Diabetic foot examination  
66Ac.00 Diabetic peripheral neuropathy screening  
66Ai.00 Diabetic 6 month review  
66Ak.00 Diabetic monitoring - lower risk albumin excretion  
66Al.00 Diabetic monitoring - higher risk albumin excretion  
66Am.00 Insulin dose changed  
66Ao.00 Diabetes type 2 review  
66Ap.00 Insulin treatment initiated  
66Aq.00 Diabetic foot screen  
66Ar.00 Insulin treatment stopped  
66As.00 Diabetic on subcutaneous treatment  
66At.00 Diabetic dietary review  
66At100 Type II diabetic dietary review  
66At111 Type 2 diabetic dietary review

66Au.00 Diabetic erectile dysfunction review  
66Av.00 Diabetic assessment of erectile dysfunction  
66Az.00 High risk of diabetes mellitus annual review  
66o5.00 Diabetic on oral treatment and glucagon-like peptide 1  
66o6.00 Diabetic on insulin and glucagon-like peptide 1  
6761.00 Diabetic pre-pregnancy counselling  
679L000 Education in self management of diabetes  
679R.00 Patient offered diabetes structured education program  
67D8.00 Provision of diabetes clinical summary  
67IJ100 Pre-conception advice for diabetes mellitus  
68A7.00 Diabetic retinopathy screening  
68A9.00 Diabetic retinopathy screening offered  
68AB.00 Diabetic digital retinopathy screening offered  
889A.00 Diab mellit insulin-glucose infus acute myocardial in  
8A12.00 Diabetic crisis monitoring  
8A13.00 Diabetic stabilisation  
8B3L.00 Diabetes medication review  
8BAi.00 Insulin passport completed  
8BAj.00 Informed dissent not to carry insulin passport  
8BAm.00 Insulin passport checked  
8BAp.00 Insulin passport not checked  
8BL2.00 Patient on maximal tolerated therapy for diabetes  
8CA4100 Pt advised re diabetic diet  
8CE0100 Insulin alert patient information booklet given  
8CE0200 Insulin passport given  
8CMW700 Diabetes clinical pathway  
8CP2.00 Transition of diabetes care options discussed  
8CR2.00 Diabetes clinical management plan  
8CS0.00 Diabetes care plan agreed  
8H2J.00 Admit diabetic emergency  
8H3O.00 Non-urgent diabetic admission  
8H4F.00 Referral to diabetologist  
8H4e.00 Referral to diabetes special interest general practit  
8H7C.00 Refer, diabetic liaison nurse  
8H7f.00 Referral to diabetes nurse  
8H7r.00 Refer to diabetic foot screener  
8HBG.00 Diabetic retinopathy 12 month review  
8HBH.00 Diabetic retinopathy 6 month review  
8HHy.00 Referral to diabetic register  
8HKE.00 Diabetology D.V. requested  
8HLE.00 Diabetology D.V. done  
8HME.00 Listed for Diabetology admissn  
8HTE100 Referral to community diabetes clinic  
8HTe.00 Referral to diabetes preconception counselling clinic  
8HTi.00 Referral to multidisciplinary diabetic clinic  
8HTk.00 Referral to diabetic eye clinic  
8HVU.00 Private referral to diabetologist  
8Hg4.00 Discharged from care of diabetes specialist nurse  
8HgC.00 Discharged from diabetes shared care programme  
8Hj1.00 Family/carer referral to diabetes structured education  
8Hj4.00 Referral to DESMOND diabetes structured education programme

8H11.00 Referral for diabetic retinopathy screening  
8H14.00 Referral to community diabetes specialist nurse  
8H1c.00 Referral to community diabetes service  
8I3W.00 Diabetic foot examination declined  
8I3X.00 Diabetic retinopathy screening refused  
8I57.00 Patient held diabetic record declined  
8I6F.00 Diabetic retinopathy screening not indicated  
8I6G.00 Diabetic foot examination not indicated  
8I83.00 Did not complete DESMOND diabetes structured educat program  
8IAs.00 Diabetic dietary review declined  
8IE2.00 Diabetes care plan declined  
8IEQ.00 Referral to community diabetes specialist nurse decli  
918T.00 Diabetes key contact  
9360.00 Patient held diabetic record issued  
93C4.00 Patient consent given for addition to diabetic regist  
9M00.00 Informed consent for diabetes national audit  
9M10.00 Informed dissent for diabetes national audit  
9N0m.00 Seen in diabetic nurse consultant clinic  
9N0n.00 Seen in community diabetes specialist clinic  
9N0o.00 Seen in community diabetic specialist nurse clinic  
9N1Q.00 Seen in diabetic clinic  
9N1i.00 Seen in diabetic foot clinic  
9N1o.00 Seen in multidisciplinary diabetic clinic  
9N1v.00 Seen in diabetic eye clinic  
9N2d.00 Seen by diabetologist  
9N2i.00 Seen by diabetic liaison nurse  
9N4I.00 DNA - Did not attend diabetic clinic  
9N4p.00 Did not attend diabetic retinopathy clinic  
9NJy.00 In-house diabetic foot screening  
9NM0.00 Attending diabetes clinic  
9NN8.00 Under care of diabetologist  
9NN9.00 Under care of diabetes specialist nurse  
9NN9000 Under care hos diab spec nurse  
9NN9100 Under care com diab spec nurse  
9NND.00 Under care of diabetic foot screener  
9NiD.00 Did not attend DESMOND diabetes structured education program  
9NiZ.00 Did not attend diabetes foot screening  
9NI4.00 Seen by general practitioner special interest in diab  
9NIP100 Seen by diabetes speclst nurse  
9OL..00 Diabetes monitoring admin.  
9OL..11 Diabetes clinic administration  
9OL1.00 Attends diabetes monitoring  
9OL2.00 Refuses diabetes monitoring  
9OL3.00 Diabetes monitoring default  
9OL4.00 Diabetes monitoring 1st letter  
9OL5.00 Diabetes monitoring 2nd letter  
9OL6.00 Diabetes monitoring 3rd letter  
9OL7.00 Diabetes monitor.verbal invite  
9OL8.00 Diabetes monitor.phone invite  
9OL9.00 Diabetes monitoring deleted  
9OLA.00 Diabetes monitor. check done

9OLA.11 Diabetes monitored  
 9OLD.00 Diabetic patient unsuitable for digital retinal photo  
 9OLJ.00 DAFNE diabetes structured education programme complet  
 9OLK.00 DESMOND diabetes structured education programme completed  
 9OLN.00 Diabetes monitor invitation by SMS (short message ser  
 9OLZ.00 Diabetes monitoring admin.NOS  
 9Oy..00 Diabetes screening administration  
 9b92000 Diabetic medicine  
 9h4..00 Exception reporting: diabetes quality indicators  
 9h41.00 Excepted from diabetes qual indicators: Patient unsui  
 9h42.00 Excepted from diabetes quality indicators: Informed d  
 9h43.00 Excepted from diabetes qual indicators: service unava  
 9m0..00 Diabetic retinopathy screening administrative status  
 9m00.00 Eligible for diabetic retinopathy screening  
 9m01.00 Ineligible for diabetic retinopathy screening  
 9m02.00 Eligb temp inactv diab ret scr  
 9m03.00 Eligb perm inactv diab ret scr  
 9m04.00 Excluded from diabetic retinopathy screening  
 9m05.00 Excluded from diabetic retinopathy screening as moved  
 9m06.00 Excluded from diabetic retinopathy screening as decea  
 9m07.00 Excluded diabetc retinop screen as under care ophthal  
 9m08.00 Exclu diab ret screen as blind  
 9m0A.00 Declined diabetic retinop scrn  
 9m0B.00 Ex diab ret scr no cntct detls  
 9m0C.00 Excluded frm diabetic retinopathy screen as terminal  
 9m0D.00 Excluded from diabetic retinophy screen as learn dis  
 9m0E.00 Excluded from diabetic retinopathy screen physical di  
 C10..00 Diabetes mellitus  
 C100.00 Diabetes mellitus with no mention of complication  
 C100000 Diabetes mellitus, juvenile type, no mention of compl  
 C100011 Insulin dependent diabetes mellitus  
 C100100 Diabetes mellitus, adult onset, no mention of complic  
 C100111 Maturity onset diabetes  
 C100112 Non-insulin dependent diabetes mellitus  
 C100z00 Diabetes mellitus NOS with no mention of complication  
 C101.00 Diabetes mellitus with ketoacidosis  
 C101000 Diabetes mellitus, juvenile type, with ketoacidosis  
 C101100 Diabetes mellitus, adult onset, with ketoacidosis  
 C101y00 Other specified diabetes mellitus with ketoacidosis  
 C101z00 Diabetes mellitus NOS with ketoacidosis  
 C102.00 Diabetes mellitus with hyperosmolar coma  
 C102100 Diabetes mellitus, adult onset, with hyperosmolar com  
 C102z00 Diabetes mellitus NOS with hyperosmolar coma  
 C103.00 Diabetes mellitus with ketoacidotic coma  
 C103100 Diabetes mellitus, adult onset, with ketoacidotic com  
 C103y00 Other specified diabetes mellitus with coma  
 C103z00 Diabetes mellitus NOS with ketoacidotic coma  
 C104.00 Diabetes mellitus with renal manifestation  
 C104.11 Diabetic nephropathy  
 C104100 Diabetes mellitus, adult onset, with renal manifestat  
 C104y00 Other specified diabetes mellitus with renal complica

|         |                                                       |
|---------|-------------------------------------------------------|
| C104z00 | Diabetes mellitus with nephropathy NOS                |
| C105.00 | Diabetes mellitus with ophthalmic manifestation       |
| C105000 | Diabetes mellitus, juvenile type, + ophthalmic manife |
| C105100 | Diabetes mellitus, adult onset, + ophthalmic manifest |
| C105y00 | Other specified diabetes mellitus with ophthalmic com |
| C105z00 | Diabetes mellitus NOS with ophthalmic manifestation   |
| C106.00 | Diabetes mellitus with neurological manifestation     |
| C106.11 | Diabetic amyotrophy                                   |
| C106.12 | Diabetes mellitus with neuropathy                     |
| C106.13 | Diabetes mellitus with polyneuropathy                 |
| C106000 | Diabetes mellitus, juvenile, + neurological manife    |
| C106100 | Diabetes mellitus, adult onset, + neurological manife |
| C106y00 | Other specified diabetes mellitus with neurological c |
| C106z00 | Diabetes mellitus NOS with neurological manifestation |
| C107.00 | Diabetes mellitus with peripheral circulatory disorde |
| C107.11 | Diabetes mellitus with gangrene                       |
| C107.12 | Diabetes with gangrene                                |
| C107000 | Diabetes mellitus, juvenile +peripheral circulatory d |
| C107100 | Diabetes mellitus, adult, + peripheral circulatory di |
| C107200 | Diabetes mellitus, adult with gangrene                |
| C107400 | NIDDM with peripheral circulatory disorder            |
| C107y00 | Other specified diabetes mellitus with periph circ co |
| C107z00 | Diabetes mellitus NOS with peripheral circulatory dis |
| C109.00 | Non-insulin dependent diabetes mellitus               |
| C109.11 | NIDDM - Non-insulin dependent diabetes mellitus       |
| C109.12 | Type 2 diabetes mellitus                              |
| C109.13 | Type II diabetes mellitus                             |
| C109000 | Non-insulin-dependent diabetes mellitus with renal co |
| C109011 | Type II diabetes mellitus with renal complications    |
| C109012 | Type 2 diabetes mellitus with renal complications     |
| C109100 | Non-insulin-dependent diabetes mellitus with ophthalm |
| C109111 | Type II diabetes mellitus with ophthalmic complicatio |
| C109112 | Type 2 diabetes mellitus with ophthalmic complication |
| C109200 | Non-insulin-dependent diabetes mellitus with neuro co |
| C109211 | Type II diabetes mellitus with neurological complicat |
| C109212 | Type 2 diabetes mellitus with neurological complicati |
| C109300 | Non-insulin-dependent diabetes mellitus with multiple |
| C109311 | Type II diabetes mellitus with multiple complications |
| C109312 | Type 2 diabetes mellitus with multiple complications  |
| C109400 | Non-insulin dependent diabetes mellitus with ulcer    |
| C109411 | Type II diabetes mellitus with ulcer                  |
| C109412 | Type 2 diabetes mellitus with ulcer                   |
| C109500 | Non-insulin dependent diabetes mellitus with gangrene |
| C109511 | Type II diabetes mellitus with gangrene               |
| C109512 | Type 2 diabetes mellitus with gangrene                |
| C109600 | Non-insulin-dependent diabetes mellitus with retinopa |
| C109611 | Type II diabetes mellitus with retinopathy            |
| C109612 | Type 2 diabetes mellitus with retinopathy             |
| C109700 | Non-insulin dependent diabetes mellitus - poor contro |
| C109711 | Type II diabetes mellitus - poor control              |
| C109712 | Type 2 diabetes mellitus - poor control               |

|         |                                                       |
|---------|-------------------------------------------------------|
| C109900 | Non-insulin-dependent diabetes mellitus without compl |
| C109911 | Type II diabetes mellitus without complication        |
| C109912 | Type 2 diabetes mellitus without complication         |
| C109A00 | Non-insulin dependent diabetes mellitus with mononeur |
| C109A11 | Type II diabetes mellitus with mononeuropathy         |
| C109A12 | Type 2 diabetes mellitus with mononeuropathy          |
| C109B00 | Non-insulin dependent diabetes mellitus with polyneur |
| C109B11 | Type II diabetes mellitus with polyneuropathy         |
| C109B12 | Type 2 diabetes mellitus with polyneuropathy          |
| C109C00 | Non-insulin dependent diabetes mellitus with nephropa |
| C109C11 | Type II diabetes mellitus with nephropathy            |
| C109C12 | Type 2 diabetes mellitus with nephropathy             |
| C109D00 | Non-insulin dependent diabetes mellitus with hypoglyc |
| C109D11 | Type II diabetes mellitus with hypoglycaemic coma     |
| C109D12 | Type 2 diabetes mellitus with hypoglycaemic coma      |
| C109E00 | Non-insulin depend diabetes mellitus with diabetic ca |
| C109E11 | Type II diabetes mellitus with diabetic cataract      |
| C109E12 | Type 2 diabetes mellitus with diabetic cataract       |
| C109F00 | Non-insulin-dependent d m with peripheral angiopath   |
| C109F11 | Type II diabetes mellitus with peripheral angiopathy  |
| C109F12 | Type 2 diabetes mellitus with peripheral angiopathy   |
| C109G00 | Non-insulin dependent diabetes mellitus with arthropa |
| C109G11 | Type II diabetes mellitus with arthropathy            |
| C109G12 | Type 2 diabetes mellitus with arthropathy             |
| C109H00 | Non-insulin dependent d m with neuropathic arthropath |
| C109H11 | Type II diabetes mellitus with neuropathic arthropath |
| C109H12 | Type 2 diabetes mellitus with neuropathic arthropathy |
| C109J00 | Insulin treated Type 2 diabetes mellitus              |
| C109J11 | Insulin treated non-insulin dependent diabetes mellit |
| C109J12 | Insulin treated Type II diabetes mellitus             |
| C109K00 | Hyperosmolar non-ketotic state in type 2 diabetes mel |
| C10A.00 | Malnutrition-related diabetes mellitus                |
| C10A000 | Malnutrition-related diabetes mellitus with coma      |
| C10A100 | Malnutrition-related diabetes mellitus with ketoacido |
| C10A200 | Malnutrition-related diabetes mellitus with renal com |
| C10A300 | Malnutrit-related diabetes mellitus wth ophthalmic co |
| C10A400 | Malnutrition-related diabetes mellitus wth neuro comp |
| C10A500 | Malnutritn-relat diabetes melitus wth periph circul c |
| C10A600 | Malnutrition-related diabetes mellitus with multiple  |
| C10A700 | Malnutrition-related diabetes mellitus without compli |
| C10AW00 | Malnutrit-related diabetes mellitus with unspec compl |
| C10AX00 | Malnutrit-relat diabetes mellitus with other spec com |
| C10B.00 | Diabetes mellitus induced by steroids                 |
| C10B000 | Steroid induced diabetes mellitus without complicatio |
| C10C.00 | Diabetes mellitus autosomal dominant                  |
| C10D.00 | Diabetes mellitus autosomal dominant type 2           |
| C10D.11 | Maturity onset diabetes in youth type 2               |
| C10F.00 | Type 2 diabetes mellitus                              |
| C10F.11 | Type II diabetes mellitus                             |
| C10F000 | Type 2 diabetes mellitus with renal complications     |
| C10F011 | Type II diabetes mellitus with renal complications    |



|         |                                                       |
|---------|-------------------------------------------------------|
| C10F100 | Type 2 diabetes mellitus with ophthalmic complication |
| C10F111 | Type II diabetes mellitus with ophthalmic complicatio |
| C10F200 | Type 2 diabetes mellitus with neurological complicati |
| C10F211 | Type II diabetes mellitus with neurological complicat |
| C10F300 | Type 2 diabetes mellitus with multiple complications  |
| C10F311 | Type II diabetes mellitus with multiple complications |
| C10F400 | Type 2 diabetes mellitus with ulcer                   |
| C10F411 | Type II diabetes mellitus with ulcer                  |
| C10F500 | Type 2 diabetes mellitus with gangrene                |
| C10F511 | Type II diabetes mellitus with gangrene               |
| C10F600 | Type 2 diabetes mellitus with retinopathy             |
| C10F611 | Type II diabetes mellitus with retinopathy            |
| C10F700 | Type 2 diabetes mellitus - poor control               |
| C10F711 | Type II diabetes mellitus - poor control              |
| C10F900 | Type 2 diabetes mellitus without complication         |
| C10F911 | Type II diabetes mellitus without complication        |
| C10FA00 | Type 2 diabetes mellitus with mononeuropathy          |
| C10FA11 | Type II diabetes mellitus with mononeuropathy         |
| C10FB00 | Type 2 diabetes mellitus with polyneuropathy          |
| C10FB11 | Type II diabetes mellitus with polyneuropathy         |
| C10FC00 | Type 2 diabetes mellitus with nephropathy             |
| C10FC11 | Type II diabetes mellitus with nephropathy            |
| C10FD00 | Type 2 diabetes mellitus with hypoglycaemic coma      |
| C10FD11 | Type II diabetes mellitus with hypoglycaemic coma     |
| C10FE00 | Type 2 diabetes mellitus with diabetic cataract       |
| C10FE11 | Type II diabetes mellitus with diabetic cataract      |
| C10FF00 | Type 2 diabetes mellitus with peripheral angiopathy   |
| C10FF11 | Type II diabetes mellitus with peripheral angiopathy  |
| C10FG00 | Type 2 diabetes mellitus with arthropathy             |
| C10FG11 | Type II diabetes mellitus with arthropathy            |
| C10FH00 | Type 2 diabetes mellitus with neuropathic arthropathy |
| C10FH11 | Type II diabetes mellitus with neuropathic arthropath |
| C10FJ00 | Insulin treated Type 2 diabetes mellitus              |
| C10FJ11 | Insulin treated Type II diabetes mellitus             |
| C10FK00 | Hyperosmolar non-ketotic state in type 2 diabetes mel |
| C10FK11 | Hyperosmolar non-ketotic state in type II diabetes me |
| C10FL00 | Type 2 diabetes mellitus with persistent proteinuria  |
| C10FL11 | Type II diabetes mellitus with persistent proteinuria |
| C10FM00 | Type 2 diabetes mellitus with persistent microalbumin |
| C10FM11 | Type II diabetes mellitus with persistent microalbumi |
| C10FN00 | Type 2 diabetes mellitus with ketoacidosis            |
| C10FN11 | Type II diabetes mellitus with ketoacidosis           |
| C10FP00 | Type 2 diabetes mellitus with ketoacidotic coma       |
| C10FP11 | Type II diabetes mellitus with ketoacidotic coma      |
| C10FQ00 | Type 2 diabetes mellitus with exudative maculopathy   |
| C10FQ11 | Type II diabetes mellitus with exudative maculopathy  |
| C10FR00 | Type 2 diabetes mellitus with gastroparesis           |
| C10FR11 | Type II diabetes mellitus with gastroparesis          |
| C10FS00 | Maternally inherited diabetes mellitus                |
| C10G.00 | Secondary pancreatic diabetes mellitus                |
| C10G000 | Secondary pancreatic diabetes mellitus without compli |



C10H.00 Diabetes mellitus induced by non-steroid drugs  
C10H000 DM induced by non-steroid drugs without complication  
C10J.00 Insulin autoimmune syndrome  
C10J000 Insulin autoimmune syndrome without complication  
C10K.00 Type A insulin resistance  
C10K000 Type A insulin resistance without complication  
C10M.00 Lipoatrophic diabetes mellitus  
C10M000 Lipoatrophic diabetes mellitus without complication  
C10N.00 Secondary diabetes mellitus  
C10N000 Secondary diabetes mellitus without complication  
C10N100 Cystic fibrosis related diabetes mellitus  
C10y.00 Diabetes mellitus with other specified manifestation  
C10y000 Diabetes mellitus, juvenile, + other specified manife  
C10y100 Diabetes mellitus, adult, + other specified manifesta  
C10yy00 Other specified diabetes mellitus with other spec com  
C10yz00 Diabetes mellitus NOS with other specified manifestat  
C10z.00 Diabetes mellitus with unspecified complication  
C10z000 Diabetes mellitus, juvenile type, + unspecified compl  
C10z100 Diabetes mellitus, adult onset, + unspecified complic  
C10zy00 Other specified diabetes mellitus with unspecified co  
C10zz00 Diabetes mellitus NOS with unspecified complication  
Cyu2.00 [X]Diabetes mellitus  
Cyu2000 [X]Other specified diabetes mellitus  
Cyu2100 [X]Malnutrit-relat diabetes mellitus with other spec  
Cyu2200 [X]Malnutrit-related diabetes mellitus with unspec co  
Cyu2300 [X]Unspecified diabetes mellitus with renal complicat  
F171100 Autonomic neuropathy due to diabetes  
F35z000 Diabetic mononeuritis NOS  
F372.00 Polyneuropathy in diabetes  
F372.11 Diabetic polyneuropathy  
F372.12 Diabetic neuropathy  
F372000 Acute painful diabetic neuropathy  
F372100 Chronic painful diabetic neuropathy  
F372200 Asymptomatic diabetic neuropathy  
F381300 Myasthenic syndrome due to diabetic amyotrophy  
F381311 Diabetic amyotrophy  
F3y0.00 Diabetic mononeuropathy  
F420.00 Diabetic retinopathy  
F420000 Background diabetic retinopathy  
F420100 Proliferative diabetic retinopathy  
F420200 Preproliferative diabetic retinopathy  
F420300 Advanced diabetic maculopathy  
F420400 Diabetic maculopathy  
F420500 Advanced diabetic retinal disease  
F420600 Non proliferative diabetic retinopathy  
F420700 High risk proliferative diabetic retinopathy  
F420800 High risk non proliferative diabetic retinopathy  
F420z00 Diabetic retinopathy NOS  
F440700 Diabetic iritis  
F464000 Diabetic cataract  
G73y000 Diabetic peripheral angiopathy

|         |                                                       |
|---------|-------------------------------------------------------|
| K01x100 | Nephrotic syndrome in diabetes mellitus               |
| K08yA00 | Proteinuric diabetic nephropathy                      |
| K08yA11 | Clinical diabetic nephropathy                         |
| K27y700 | Erectile dysfunction due to diabetes mellitus         |
| Kyu0300 | [X]Glomerular disorders in diabetes mellitus          |
| L180600 | Pre-existing diabetes mellitus, non-insulin-dependent |
| L180700 | Pre-existing malnutrition-related diabetes mellitus   |
| L180X00 | Pre-existing diabetes mellitus, unspecified           |
| Lyu2900 | [X]Pre-existing diabetes mellitus, unspecified        |
| M037200 | Cellulitis in diabetic foot                           |
| M271000 | Ischaemic ulcer diabetic foot                         |
| M271100 | Neuropathic diabetic ulcer - foot                     |
| M271200 | Mixed diabetic ulcer - foot                           |
| N030000 | Diabetic cheiroarthropathy                            |
| N030011 | Diabetic cheiroopathy                                 |
| N030100 | Diabetic Charcot arthropathy                          |
| Q441.00 | Neonatal diabetes mellitus                            |
| R054200 | [D]Gangrene of toe in diabetic                        |
| R054300 | [D]Widespread diabetic foot gangrene                  |
| SL23z00 | Insulins or antidiabetic poisoning NOS                |
| TJ23.00 | Adverse reaction to insulins and antidiabetic agents  |
| TJ23z00 | Adverse reaction to insulins and antidiabetic agents  |
| U602311 | [X] Adverse reaction to insulins and antidiabetic age |
| U60231E | [X] Adverse reaction to insulins and antidiabetic age |
| ZC2C800 | Dietary advice for diabetes mellitus                  |
| ZC2C911 | Diet advice for insulin-dependent diabetes            |
| ZC2CA00 | Dietary advice for type II diabetes                   |
| ZC2CA11 | Dietary advice non-insulin-dependent diabetes         |
| ZL22500 | Under care of diabetic liaison nurse                  |
| ZL62500 | Referral to diabetes nurse                            |
| ZL62600 | Referral to diabetic liaison nurse                    |
| ZLA2500 | Seen by diabetic liaison nurse                        |
| ZLD7500 | Discharge by diabetic liaison nurse                   |
| ZRB4.00 | Diabetes clinic satisfaction questionnaire            |
| ZRB4.11 | CSQ - Diabetes clinic satisfaction questionnaire      |
| ZRB5.00 | Diabetes treatment satisfaction questionnaire         |
| ZRB5.11 | DTSQ - Diabetes treatment satisfaction questionnaire  |
| ZRB6.00 | Diabetes wellbeing questionnaire                      |
| ZRB6.11 | DWBQ - Diabetes wellbeing questionnaire               |
| ZRbH.00 | Perceived control of insulin-dependent diabetes       |
| ZV65312 | [V]Dietary counselling in diabetes mellitus           |
| ZV6DA00 | [V]Admitted for commencement of insulin               |
| ZV6DB00 | [V]Admitted for conversion to insulin                 |

## ahdcode

|            |                                |
|------------|--------------------------------|
| 1009100000 | diabetes annual check          |
| 1009111000 | diabetes current status        |
| 1009120000 | diabetes insulin dosage        |
| 1001400140 | hb a1c - diabetic control      |
| 1001400327 | diabetic retinopathy screening |

**Prediabetes Readcodes**

Review of impaired glucose tolerance  
Referral for management of impaired glucose tolerance  
Referral for impaired glucose tolerance management offered  
Impaired glucose tolerance monitoring administration  
Impaired glucose tolerance monitoring invitation  
Impaired glucose tolerance monitoring invitation 1st letter  
Impaired glucose tolerance monitoring invitation 2nd letter  
Impaired glucose tolerance monitoring invitation 3rd letter  
Impaired glucose regulation monitoring invitation  
Impaired glucose regulation monitoring invitation 1st letter  
Impaired glucose regulation monitoring invitation 2nd letter  
Impaired glucose regulation monitoring invitation 3rd letter  
Impaired glucose regulation monitoring telephone invitation  
Impaired glucose regulation monitoring verbal invitation  
Impaired glucose tolerance  
Impaired fasting glycaemia  
Impaired glucose regulation  
Pre-diabetes  
Non-diabetic hyperglycaemia  
[D]Glucose tolerance test abnormal  
[D]Prediabetes  
[D]Impaired fasting glycaemia  
[D]Impaired fasting glucose  
[D]Impaired glucose tolerance  
[X]Hyperglycaemia, unspecified  
Glucose tol. test impaired

Supplementary table 1 Incidence rate of diagnosis of type 2 diabetes per 1000 PYAR in Men by calendar year

| Year               | Age 40-49 |       | Age 50-59 |       | Age 60-69 |       | Age 70-79 |       | Age 80-89 |       | Age 90-99 |       |
|--------------------|-----------|-------|-----------|-------|-----------|-------|-----------|-------|-----------|-------|-----------|-------|
|                    | Men       | Women | Men       | Women | Men       | Women | Men       | Women | Men       | Women | Men       | Women |
| 2009               | 4.73      | 3.63  | 9.42      | 6.64  | 13.37     | 9.57  | 15.28     | 12.51 | 11.22     | 9.78  | 6.19      | 4.99  |
| 2010               | 4.87      | 3.73  | 9.3       | 6.62  | 13.65     | 9.35  | 15.26     | 12.14 | 11.42     | 9.35  | 7.44      | 6.28  |
| 2011               | 4.95      | 3.84  | 9.22      | 6.54  | 13.32     | 9.22  | 14.38     | 12.21 | 11.03     | 9.38  | 7.75      | 6.11  |
| 2012               | 4.85      | 3.65  | 9.39      | 6.61  | 13.39     | 9.35  | 14.51     | 11.93 | 11.92     | 10.42 | 8.49      | 6.15  |
| 2013               | 4.84      | 4.04  | 9.18      | 6.73  | 13.68     | 9.45  | 15.44     | 12.89 | 12.42     | 10.41 | 8.99      | 6.49  |
| 2014               | 4.57      | 3.31  | 7.94      | 5.94  | 10.92     | 7.97  | 12.36     | 9.54  | 10.87     | 8.53  | 7.24      | 4.99  |
| 2015               | 4.80      | 3.59  | 8.27      | 6.25  | 11.64     | 8.15  | 12.75     | 10.28 | 11.49     | 9.35  | 8.24      | 5.76  |
| 2016               | 4.66      | 3.58  | 7.97      | 6.24  | 11.35     | 8.14  | 11.95     | 9.46  | 10.56     | 8.24  | 7.84      | 4.93  |
| 2017               | 4.62      | 3.16  | 8.14      | 5.78  | 11.04     | 7.00  | 11.18     | 8.77  | 9.70      | 7.66  | 5.62      | 5.83  |
| 2018               | 4.20      | 2.88  | 6.60      | 4.60  | 8.91      | 5.86  | 9.47      | 7.09  | 8.48      | 6.5   | 5.48      | 4.09  |
| Drop from 2013 (%) | 13.22     | 28.71 | 28.10     | 31.65 | 34.87     | 37.99 | 38.67     | 45.00 | 31.72     | 37.56 | 39.04     | 36.98 |

Supplementary table 2 Incidence rates per 1000 PYAR of Prediabetes 2009-2018 in men and women using Read codes or HbA1c between 6.0-6.4% (42-47 mmol/mol)

| Year | Men                       |                         |               | Women                     |                         |               |
|------|---------------------------|-------------------------|---------------|---------------------------|-------------------------|---------------|
|      | Prediabetes<br>Read codes | Read codes<br>OR ↑HbA1c | %age<br>coded | Prediabetes<br>Read codes | Read codes<br>OR ↑HbA1c | %age<br>coded |
| 2009 | 2.18                      | 3.41                    | 63.93         | 1.88                      | 3.06                    | 61.44         |
| 2010 | 2.12                      | 3.67                    | 57.77         | 1.74                      | 3.33                    | 52.25         |
| 2011 | 2.05                      | 4.06                    | 50.49         | 1.69                      | 3.76                    | 44.95         |
| 2012 | 2.02                      | 5.6                     | 36.07         | 1.71                      | 5.53                    | 30.92         |
| 2013 | 2.46                      | 8.27                    | 29.75         | 2.30                      | 8.91                    | 25.81         |
| 2014 | 2.20                      | 7.54                    | 29.18         | 2.22                      | 8.45                    | 26.27         |
| 2015 | 3.26                      | 9.61                    | 33.92         | 3.46                      | 10.59                   | 32.67         |
| 2016 | 3.94                      | 8.86                    | 44.47         | 4.44                      | 10.00                   | 44.40         |
| 2017 | 3.90                      | 7.95                    | 49.06         | 4.12                      | 8.82                    | 46.71         |
| 2018 | 4.62                      | 9.89                    | 46.71         | 4.95                      | 10.75                   | 46.05         |
